# Supplementary material for: Ratios of involved nodes in early breast cancer
Source: PubMed Central journal article supplement (PMC1064081; doi:10.1186/bcr934), 2004-10-06
Supplement: bcr934-S6.pdf [file bcr934-S6.pdf]

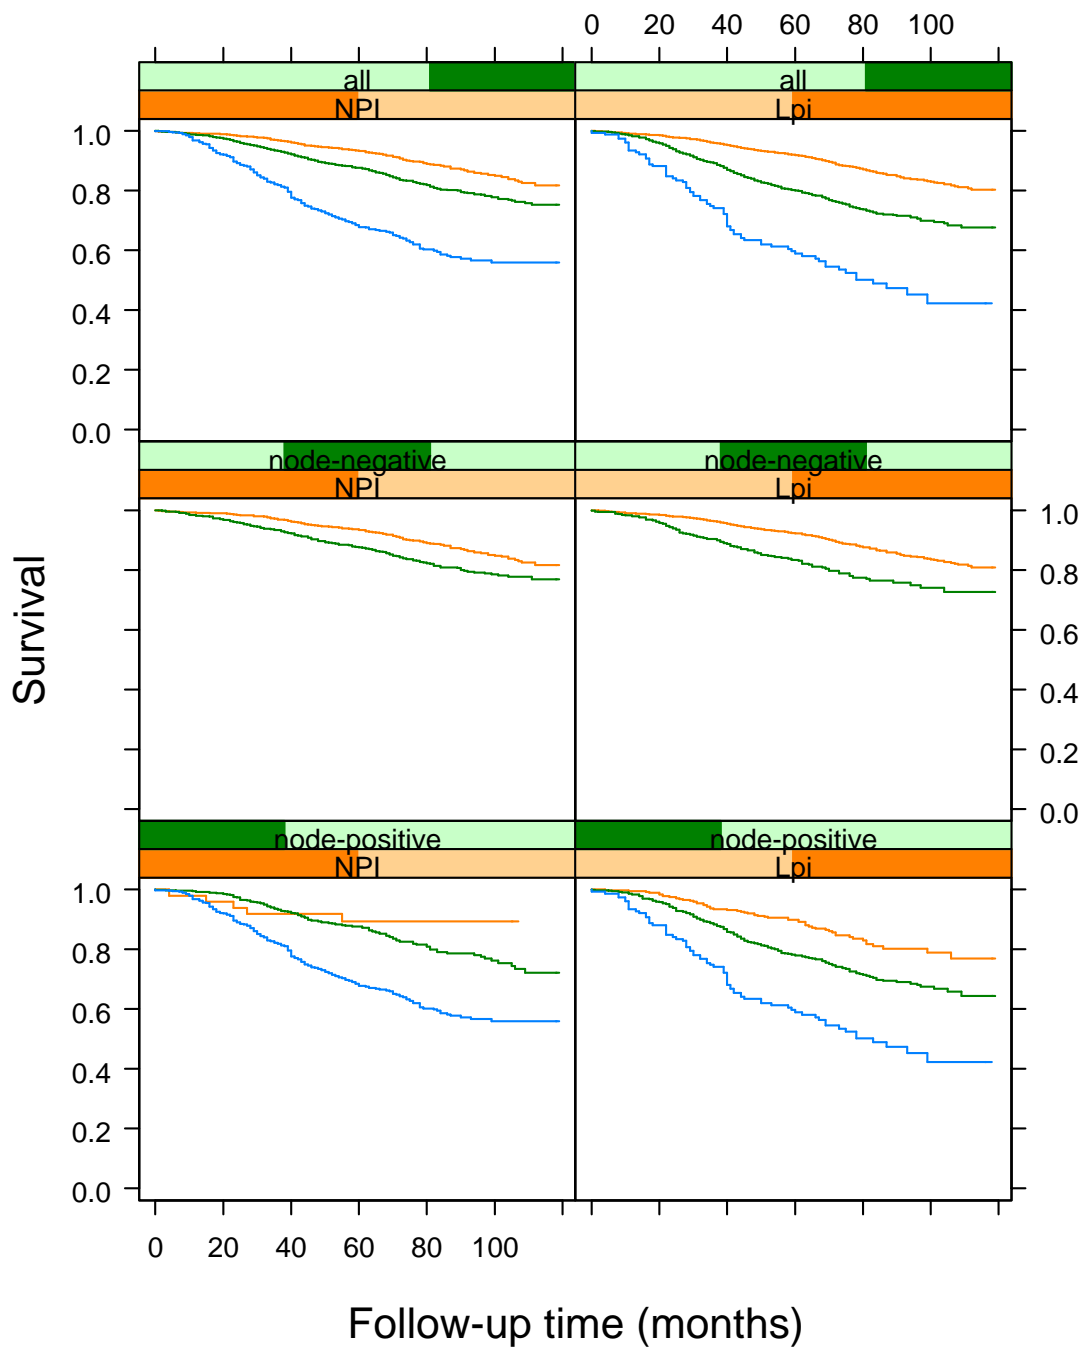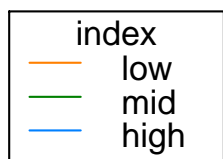

## Additional file 6

Kaplan-Meier survival estimates for T1-T2 breast cancer abstracted from the San Jose-Monterey registry, as a function of the Nottingham Prognostic Index (NPI, left column) or the ratio-based index ( $Lpi$ , right column). From top to bottom: all cases (top, n=4204 patients), node-negative (middle, n=2961), and node-positive (bottom, n=1243).
